# Supplementary material for: A bioinformatic analysis: the overexpression and clinical significance of FCGBP in ovarian cancer
Source: Aging (Albany NY). 2021 Mar 3;13(5):7416–29. doi: 10.18632/aging.202601 (PMC7993703; doi:10.18632/aging.202601)
Supplement: Supplementary Figures [file aging-13-202601-s001.pdf]

## SUPPLEMENTARY FIGURES

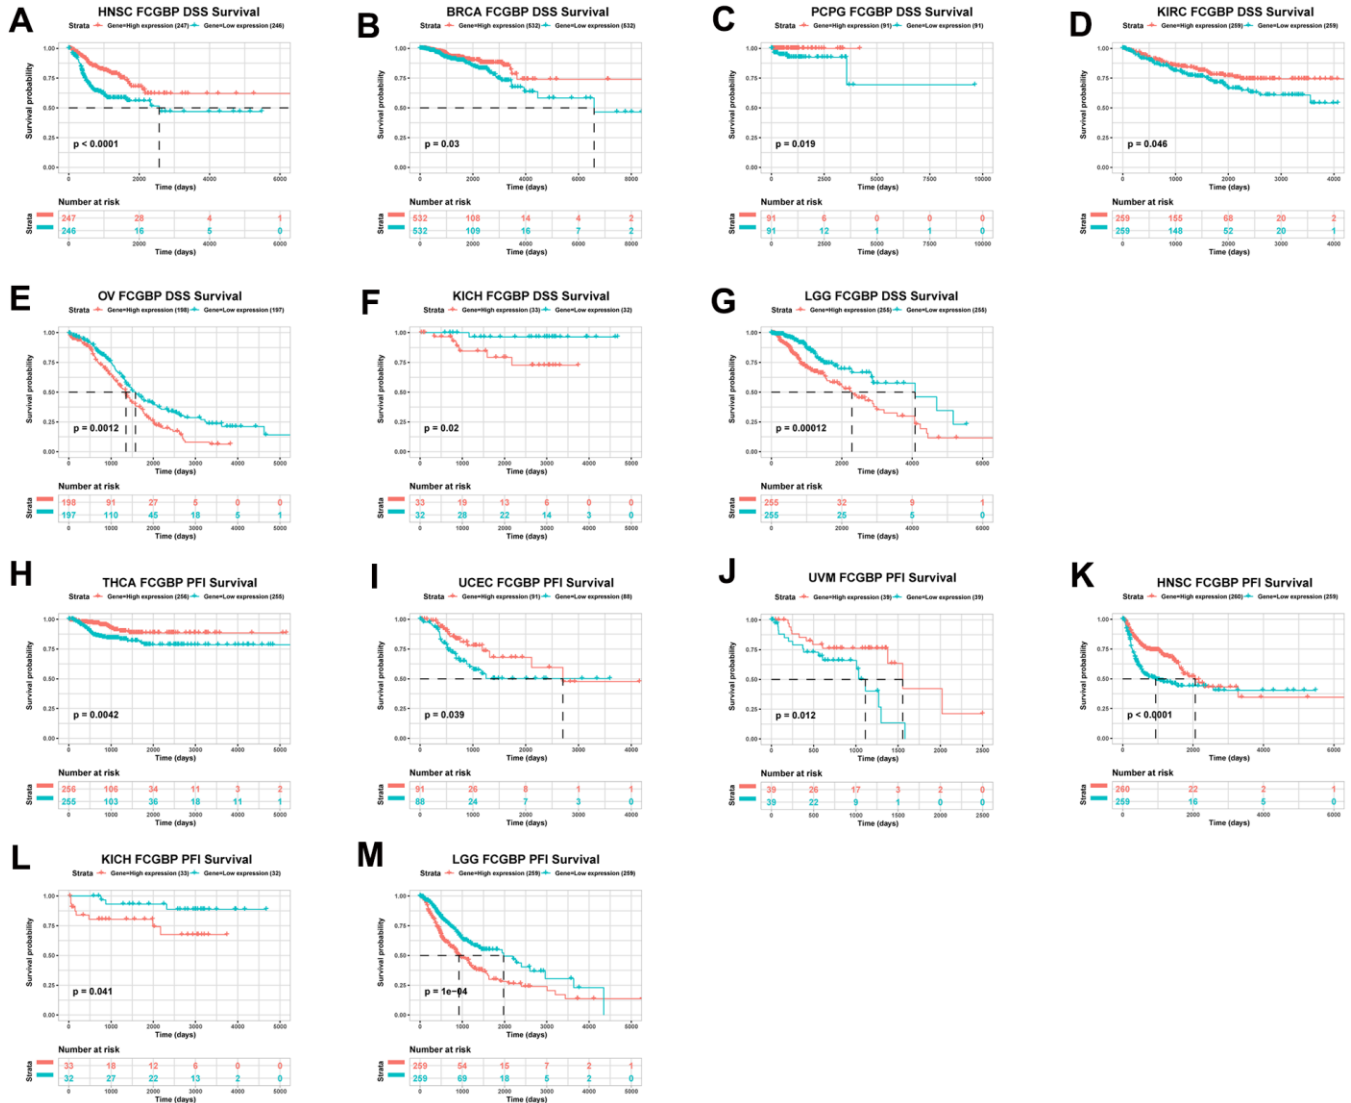

**Supplementary Figure 1. The association between FCGBP expression and cancer patient prognosis. (A–G), Kaplan–Meier analysis of disease-specific survival in TCGA, Meaningless results were not shown. (H–M), Kaplan–Meier analysis of progression free interval in TCGA, Meaningless results were not shown.**

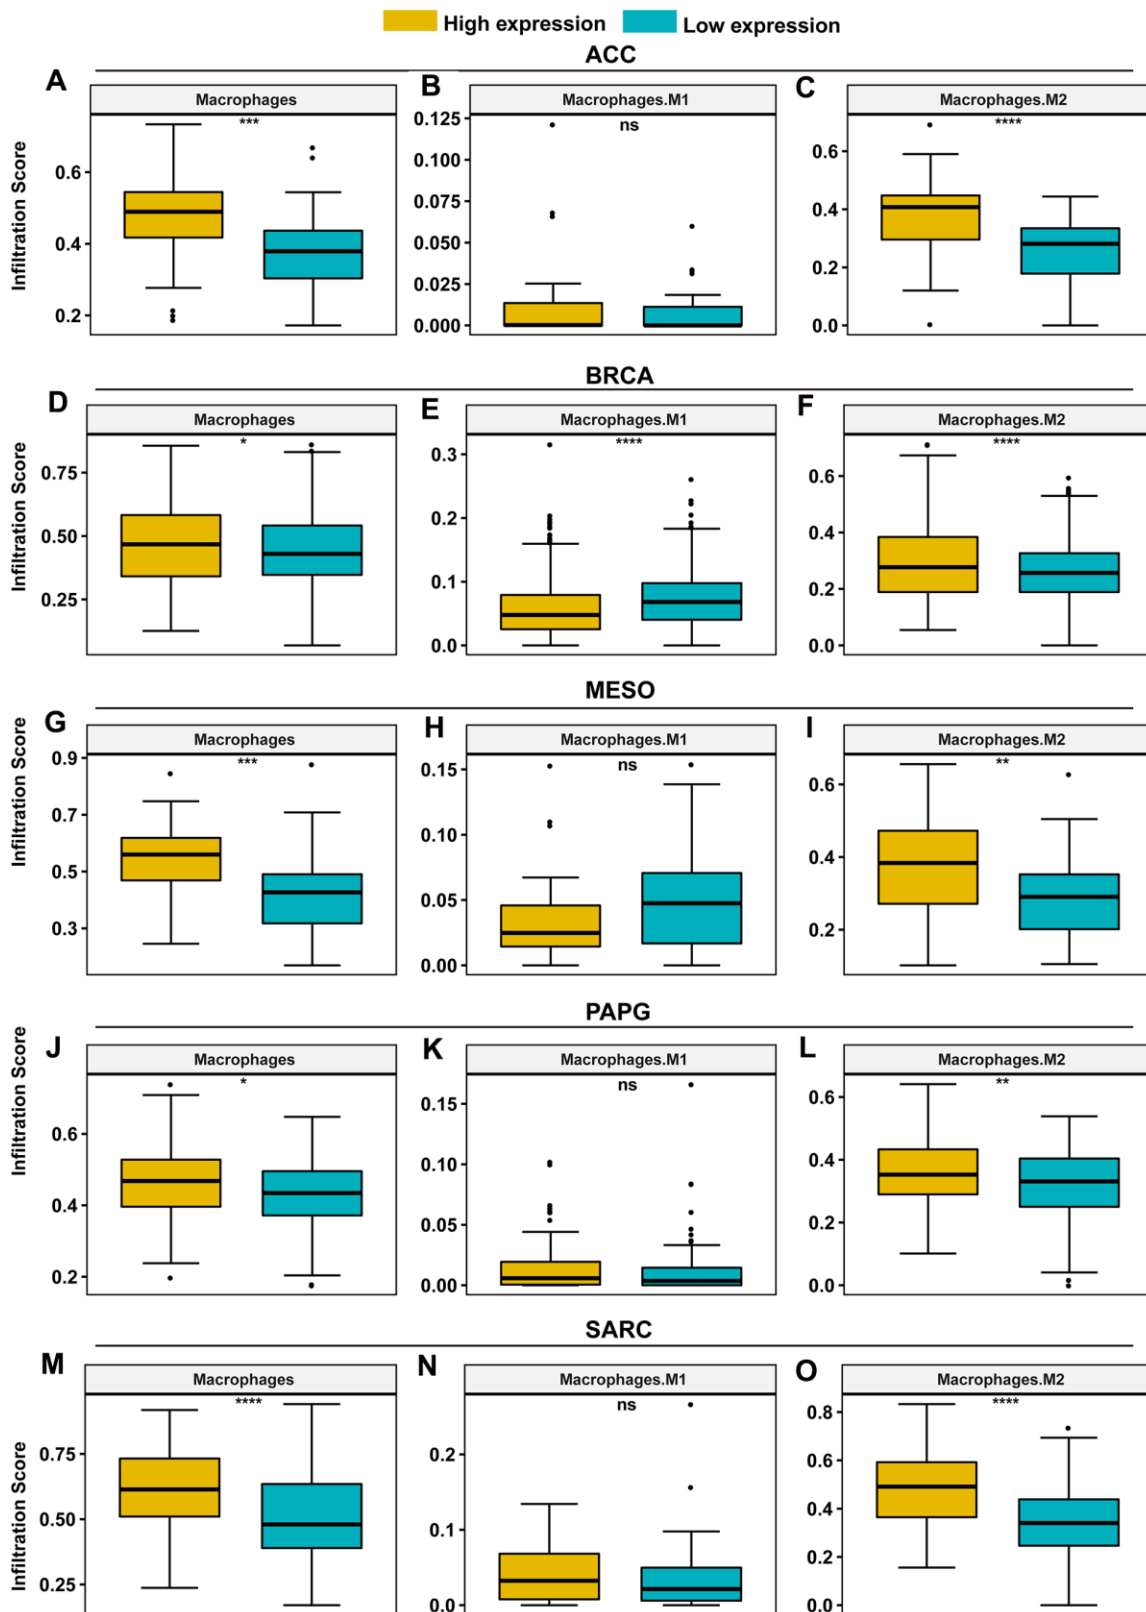

**Supplementary Figure 2. Correlation between immune cell infiltration and FCGBP in pan-cancer.** (A–C) Immune cell infiltration level in the high and low FCGBP expression groups in the ACC cohort. (D–F) Immune cell infiltration level in the high and low FCGBP expression groups in the BRCA cohort. (G–I) Immune cell infiltration level in the high and low FCGBP expression groups in the MESO cohort. (J–L) Immune cell infiltration level in the high and low FCGBP expression groups in the PAPG cohort. (M–O) Immune cell infiltration level in the high and low FCGBP expression groups in the SARC cohort.
