# Supplementary material for: A bioinformatic analysis: the overexpression and clinical significance of FCGBP in ovarian cancer
Source: publisher site journal article supplement (doi:10.18632/aging.202601), 2021-03-03
Supplement: Supplementary file [file aging-v13i5-202601-supplementary-material-SD2.pdf]

## SUPPLEMENTARY TABLE

**Supplementary Table 1. The full names of tumor abbreviation from TCGA.**

---

|      |                                                                  |
|------|------------------------------------------------------------------|
| ACC  | Adrenocortical carcinoma                                         |
| BLCA | Bladder Urothelial Carcinoma                                     |
| BRCA | Breast invasive carcinoma                                        |
| CESC | Cervical squamous cell carcinoma and endocervical adenocarcinoma |
| CHOL | Cholangiocarcinoma                                               |
| COAD | Colon adenocarcinoma                                             |
| DLBC | Lymphoid Neoplasm Diffuse Large B-cell Lymphoma                  |
| ESCA | Esophageal carcinoma                                             |
| GBM  | Glioblastoma multiforme                                          |
| HNSC | Head and Neck squamous cell carcinoma                            |
| KICH | Kidney Chromophobe                                               |
| KIRC | Kidney renal clear cell carcinoma                                |
| KIRP | Kidney renal papillary cell carcinoma                            |
| LAML | Acute Myeloid Leukemia                                           |
| LGG  | Lower Grade Glioma                                               |
| LIHC | Liver hepatocellular carcinoma                                   |
| LUAD | Lung adenocarcinoma                                              |
| LUSC | Lung squamous cell carcinoma                                     |
| MESO | Mesothelioma                                                     |
| OV   | Ovarian serous cystadenocarcinoma                                |
| PAAD | Ovarian serous cystadenocarcinoma                                |
| PCPG | Pheochromocytoma and Paraganglioma                               |
| PRAD | Prostate adenocarcinoma                                          |
| READ | Rectum adenocarcinoma                                            |
| SARC | Sarcoma                                                          |
| SKCM | Skin Cutaneous Melanoma                                          |
| STAD | Stomach adenocarcinoma                                           |
| TGCT | Testicular Germ Cell Tumor                                       |
| THCA | Thyroid carcinoma                                                |
| THYM | Thymoma                                                          |
| UCEC | Uterine Corpus Endometrial Carcinoma                             |
| UCS  | Uterine Carcinosarcoma                                           |
| UVM  | Uveal Melanoma                                                   |

---
